# Supplementary material
Source: PubMed Central journal article supplement (PMC5540771)

**Supplemental Figure 1. Additional diagnostic work up of Sibling 3 with MDS and monosomy 7.** Karyotype (A) and FISH (B) of Sibling 3 showing monosomy 7. Probes for FISH: Green; CEP 7 for chromosome 7 centromere, Red; control probe for chromosome 7. Arrow indicates cells with monosomy 7.

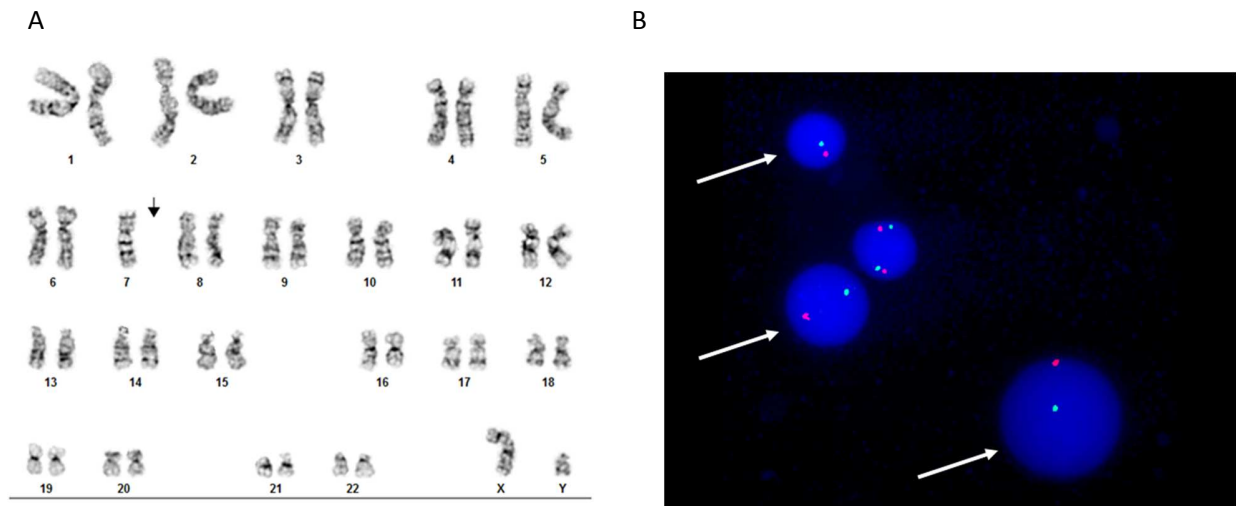

Supplement: NIHMS872883-supplement-1.pdf [file NIHMS872883-supplement-1.pdf]
