# Supplementary material
Source: PubMed Central journal article supplement (PMC5540771)
Supplement: NIHMS872883-supplement-3.pdf [file NIHMS872883-supplement-3.pdf]

**Supplemental Figure 3.** A.) Family pedigree identifying those with germline and additional *SAMD9* mutations, as well as relevant somatic mutations. Monosomy 7 status indicated by filled (monosomy 7) or open (untested karyotype) symbols. Ages at diagnosis are below pedigree symbols. B.) Variant allele frequency (VAF) obtained from WES data of additional *SAMD9* and other somatic mutations. Read counts are listed in fractions above each data point. The read counts for the *ETV6* mutation are based on amplicon deep sequencing. C.) Tables depicting results of long range PCR followed by subcloning and Sanger sequencing to determine the relationship (*cis* or *trans*) of additional *SAMD9* variants to p.E1136Q.

A

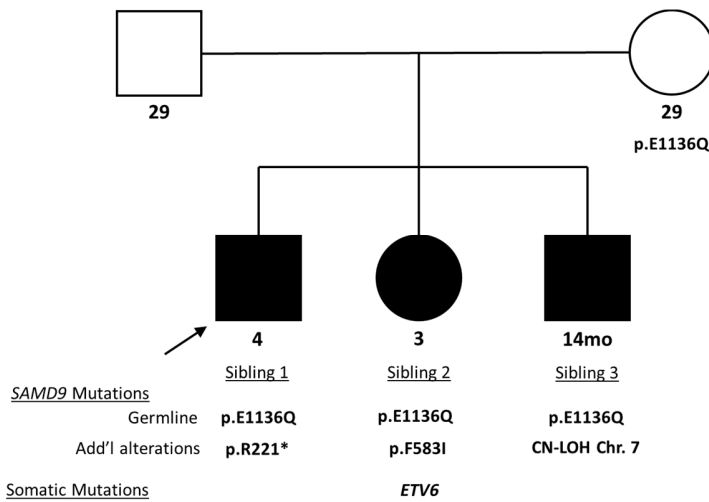

B

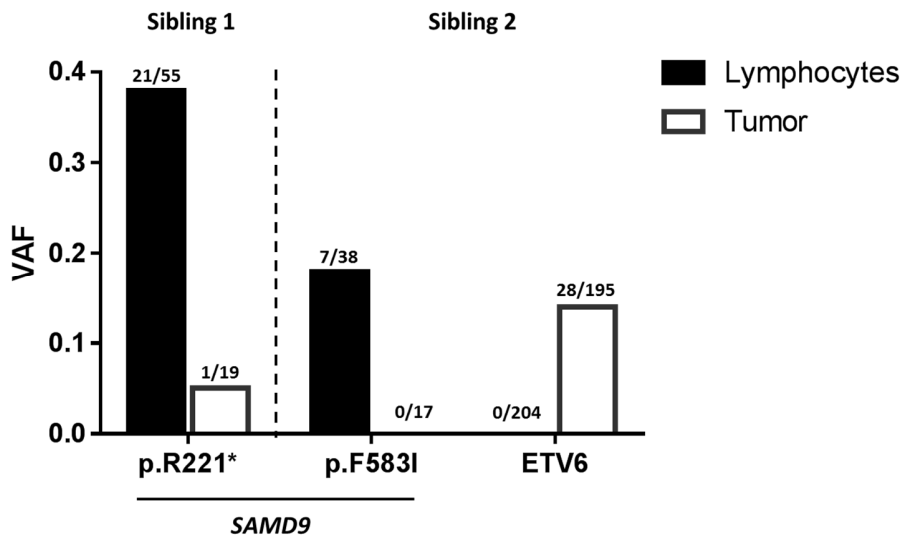

C

| patient  | clone | R221* | E1136Q |
|----------|-------|-------|--------|
| SJ015856 | 1     | mut   | mut    |
| SJ015856 | 2     | mut   | mut    |
| SJ015856 | 3     | mut   | mut    |
| SJ015856 | 4     | mut   | mut    |
| SJ015856 | 5     | mut   | mut    |
| SJ015856 | 6     | mut   | mut    |
| SJ015856 | 7     | ref   | ref    |
| SJ015856 | 8     | ref   | ref    |
| SJ015856 | 9     | ref   | mut    |
| SJ015856 | 10    | ref   | ref    |

| patient  | clone | F583I | E1136Q |
|----------|-------|-------|--------|
| SJ015855 | 1     | ref   | ref    |
| SJ015855 | 2     | ref   | mut    |
| SJ015855 | 3     | ref   | ref    |
| SJ015855 | 4     | ref   | mut    |
| SJ015855 | 5     | ref   | ref    |
| SJ015855 | 6     | ref   | mut    |
| SJ015855 | 7     | ref   | ref    |
| SJ015855 | 8     | ref   | mut    |
| SJ015855 | 9     | ref   | ref    |
| SJ015855 | 10    | ref   | mut    |
| SJ015855 | 11    | ref   | mut    |
| SJ015855 | 12    | ref   | ref    |
| SJ015855 | 13    | ref   | ref    |
| SJ015855 | 14    | ref   | ref    |
| SJ015855 | 15    | ref   | ref    |
| SJ015855 | 16    | ref   | mut    |
| SJ015855 | 17    | ref   | mut    |
| SJ015855 | 18    | mut   | mut    |
| SJ015855 | 19    | mut   | mut    |
| SJ015855 | 20    | ref   | ref    |
| SJ015855 | 21    | ref   | ref    |
| SJ015855 | 22    | ref   | mut    |
