# Supplementary material
Source: PubMed Central journal article supplement (PMC5540771)

**Supplemental Figure 2. Approach to identifying shared germline variants by WGS and WES.**

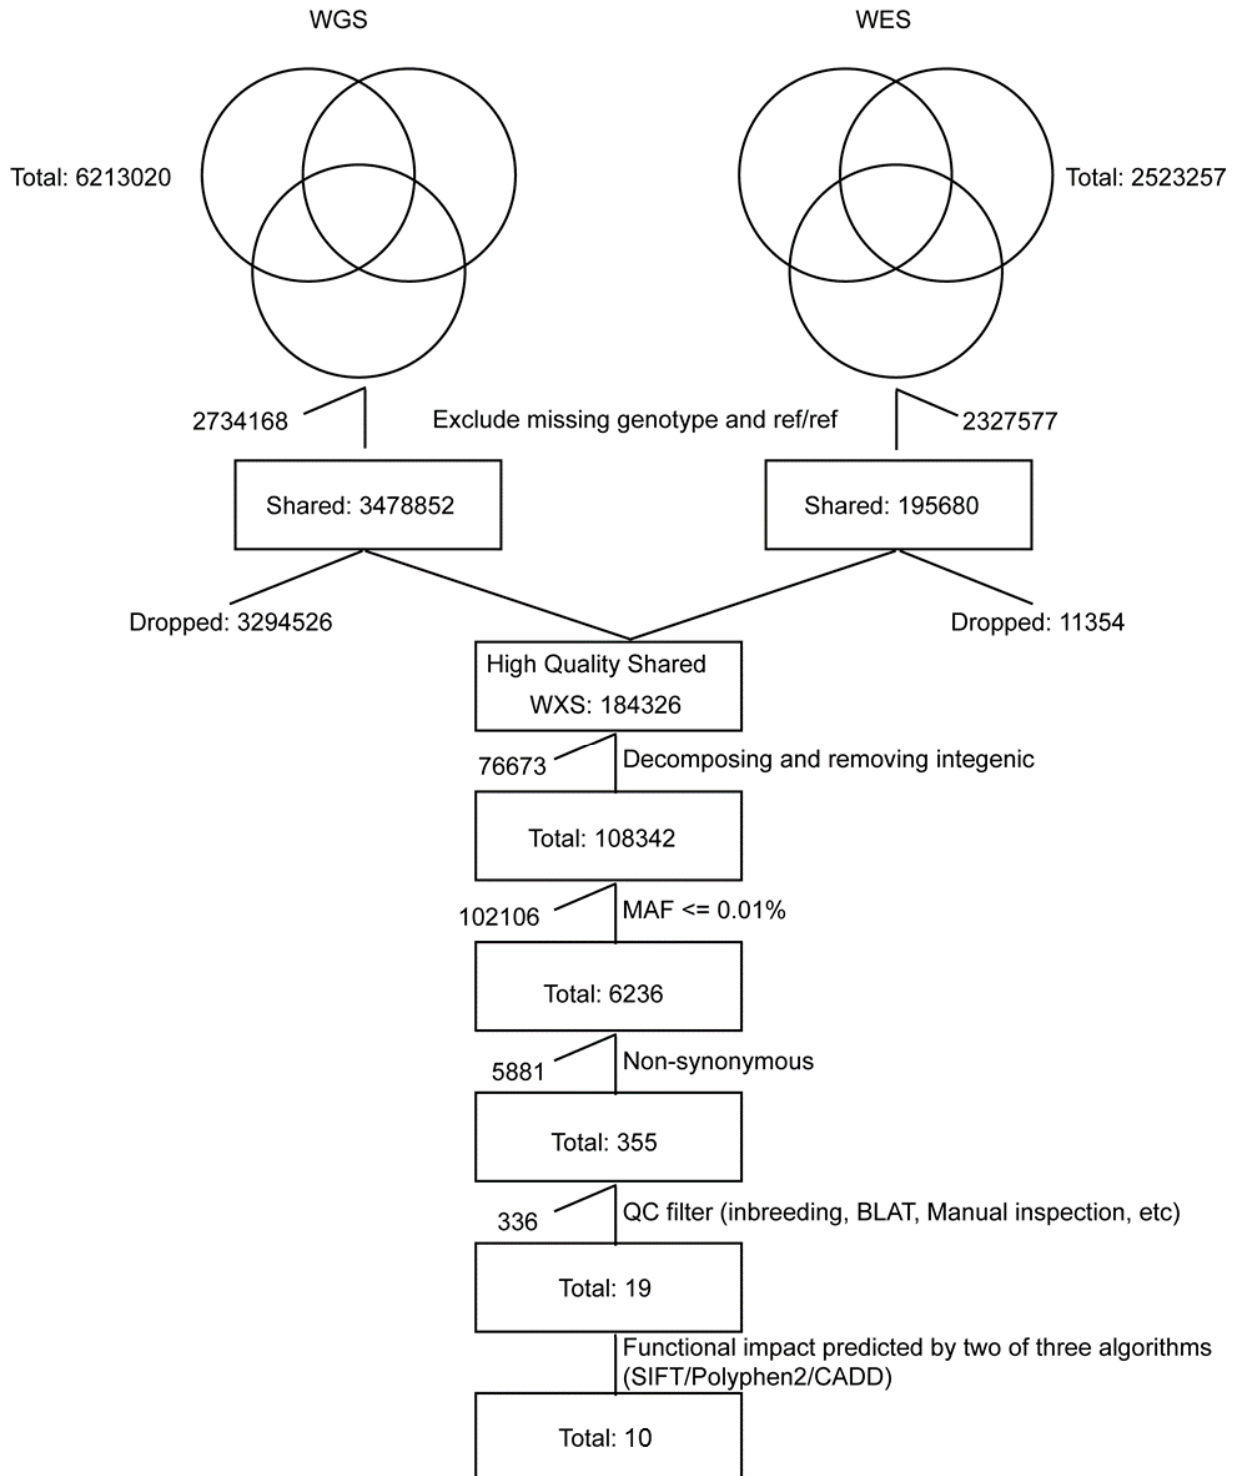

Supplement: NIHMS872883-supplement-2.pdf [file NIHMS872883-supplement-2.pdf]
